# Supplementary material for: Antigestagens Mediate the Expression of Decidualization Markers, Extracellular Matrix Factors and Connexin 43 in Decidualized Dog Uterine Stromal (DUS) Cells
Source: MDPI journal article supplement (doi:10.3390/ani12070798), 2022-03-22

Supplementary File S1

Mifepristone, PGR, approx. 100 kDa  
(Cropped)

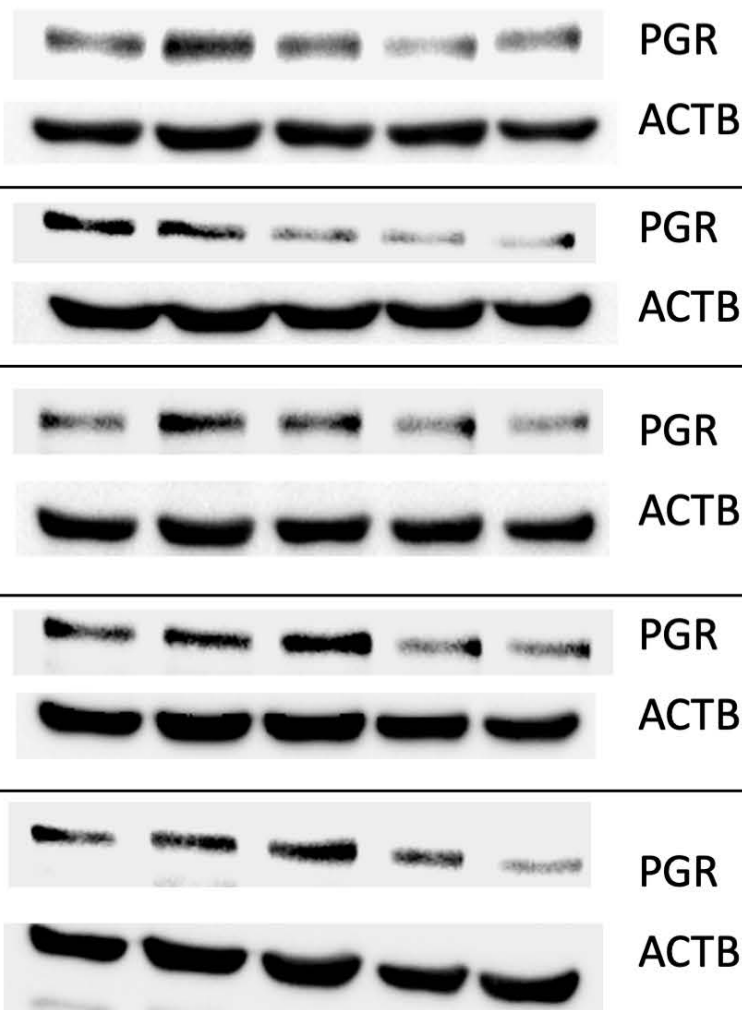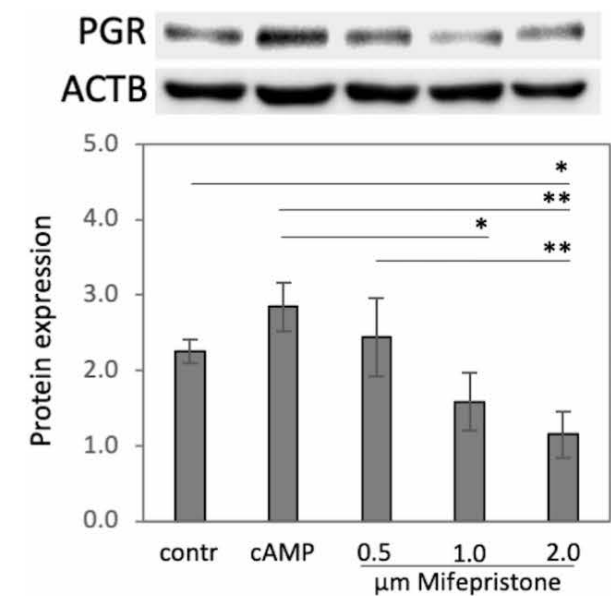

Aglepristone, PGR, approx. 100 kDa  
(Cropped)

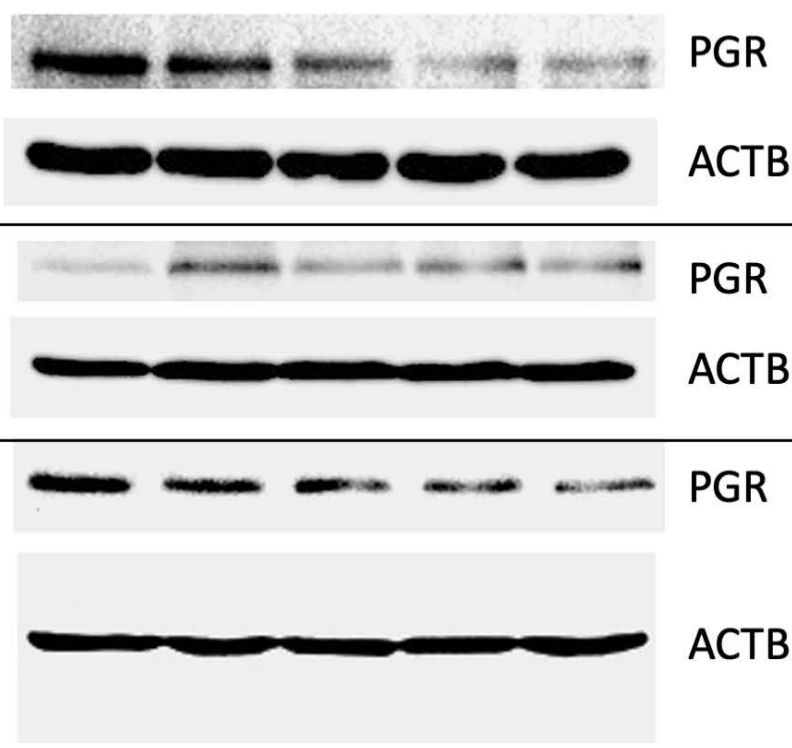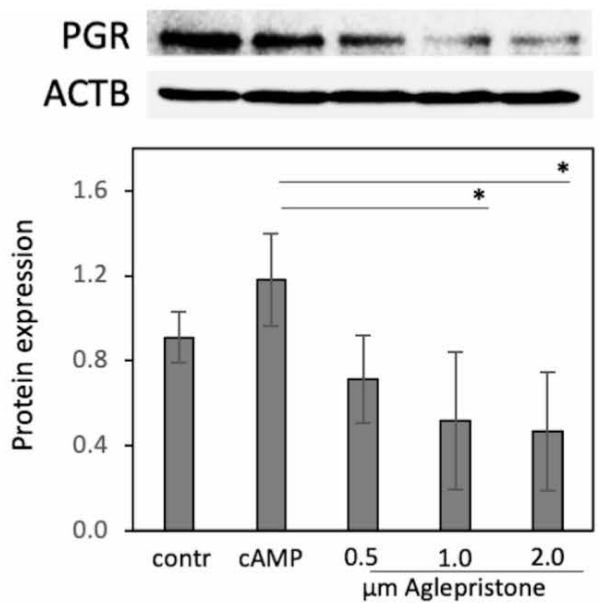

Mifepristone, VIM, 54 kDa  
(Cropped)

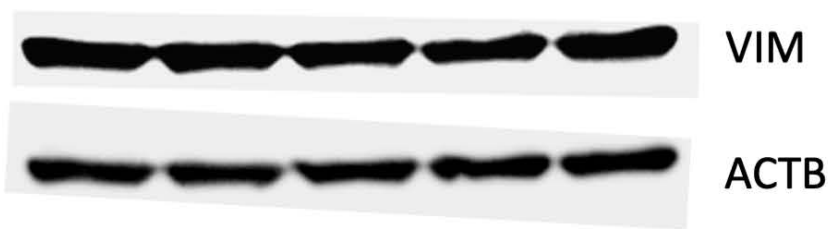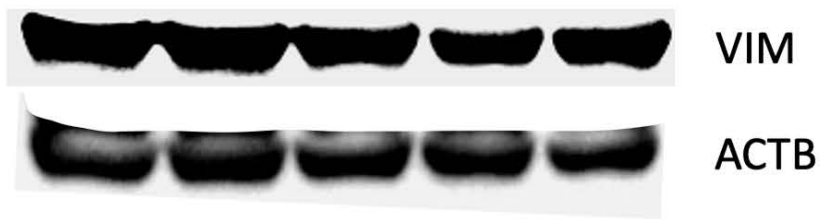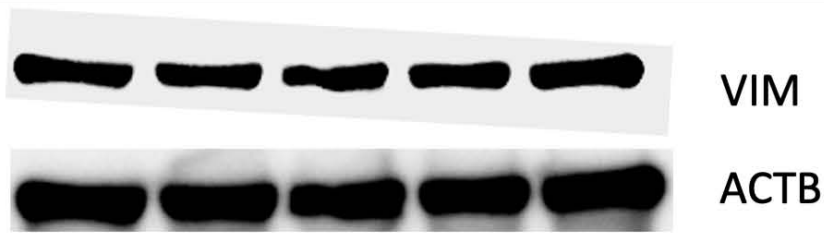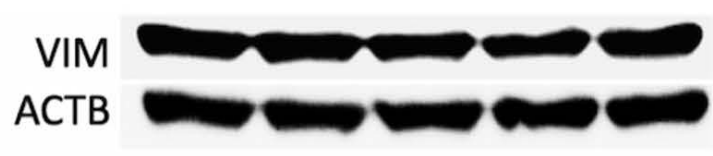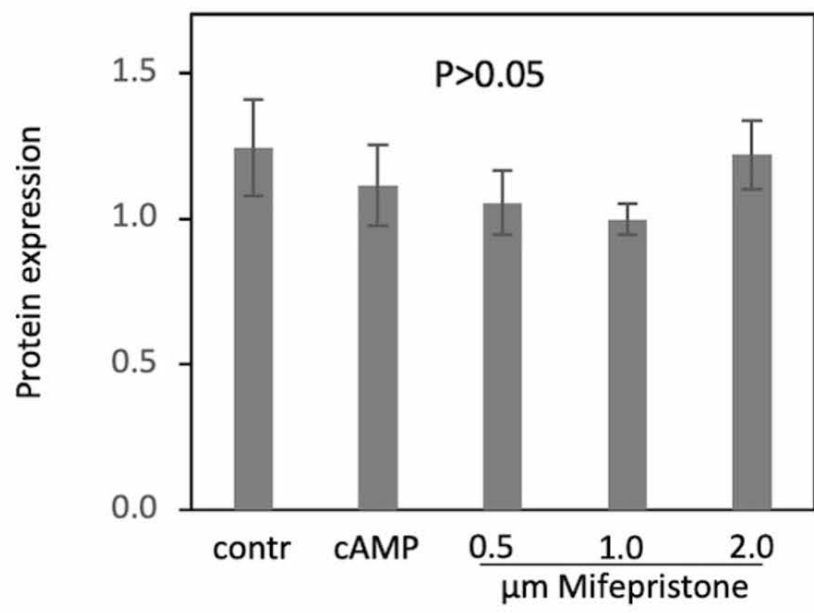

Aglepristone, VIM, 54 kDa  
(Cropped)

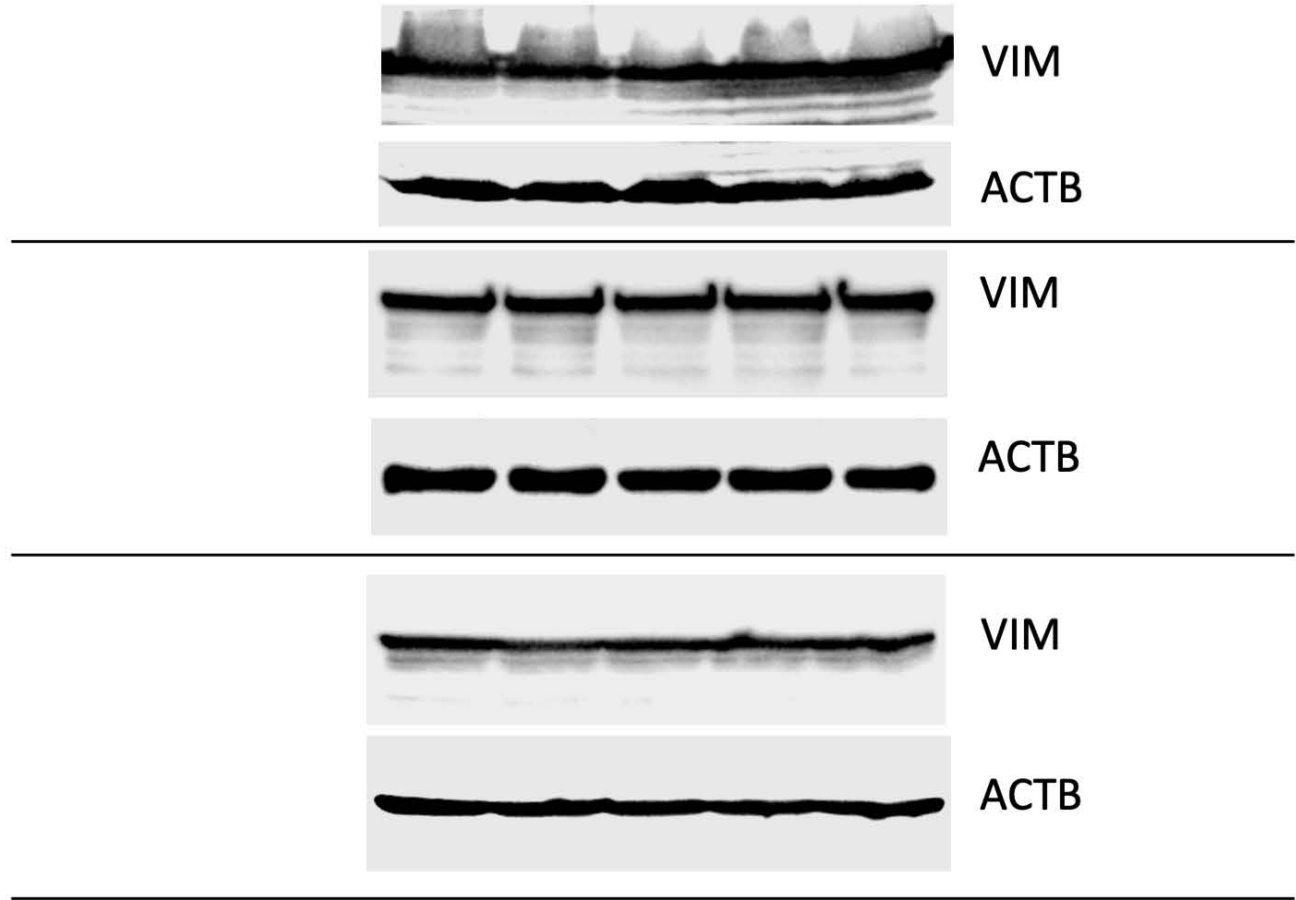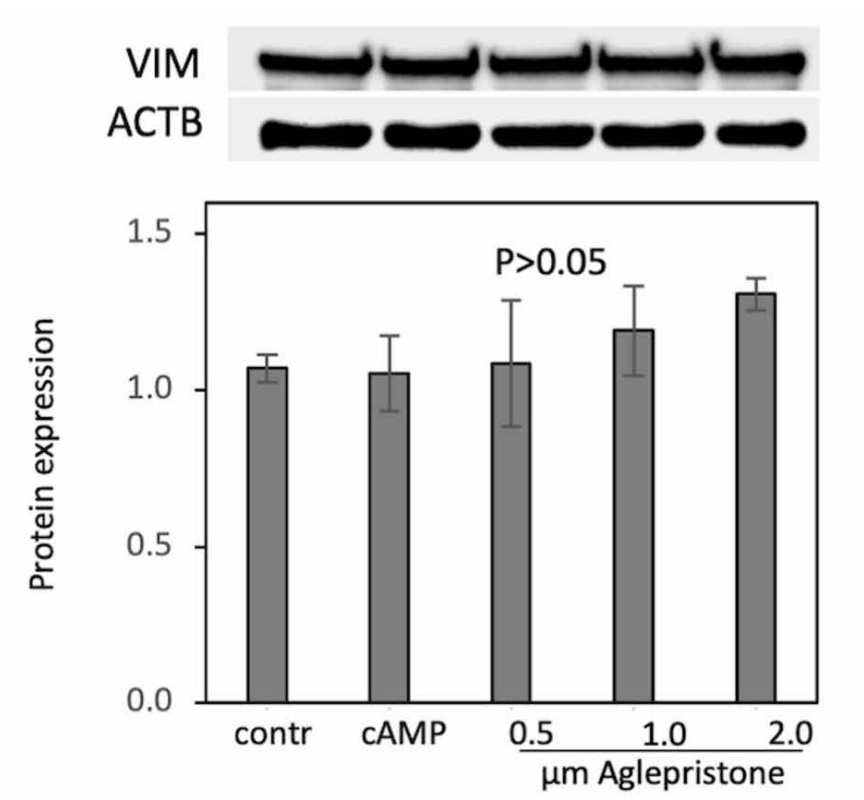



Mifepristone,  $\alpha$ -SMA, 42 kDa  
(Cropped)

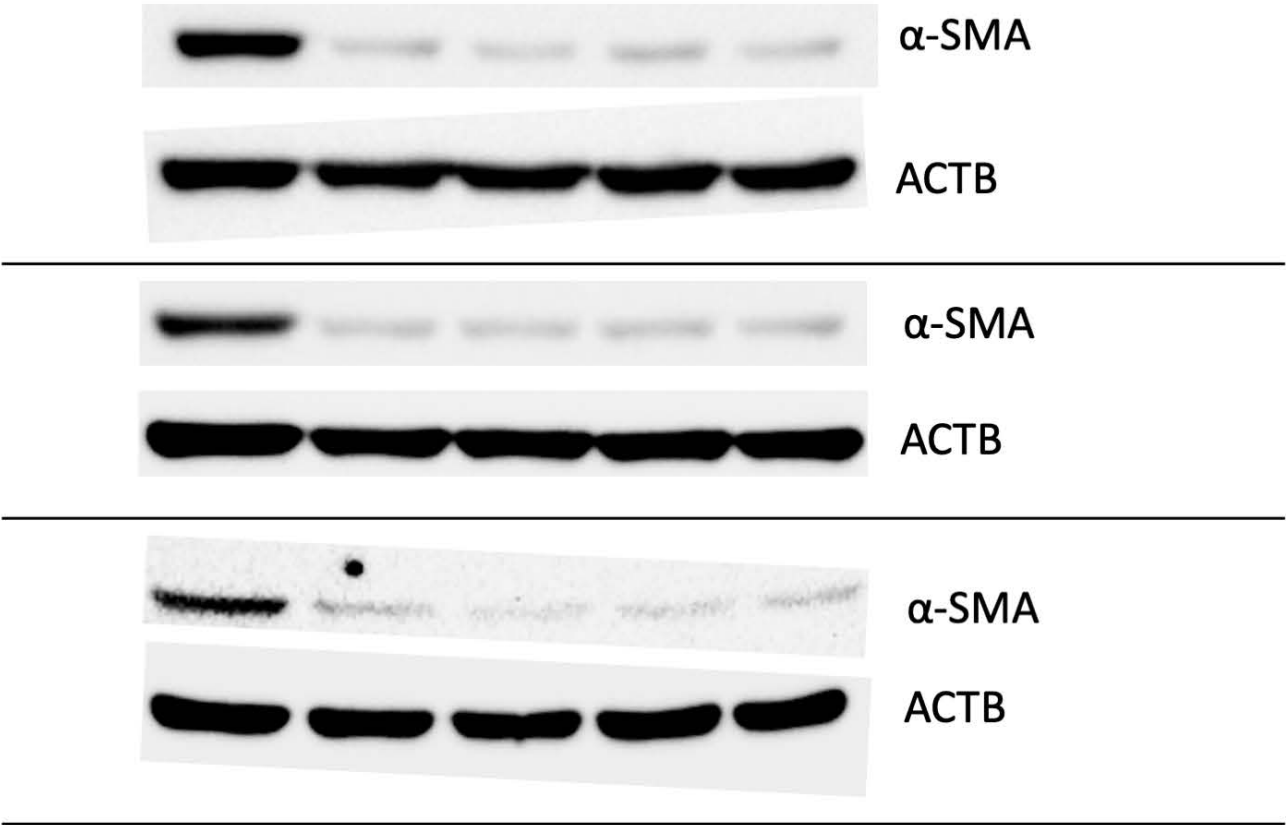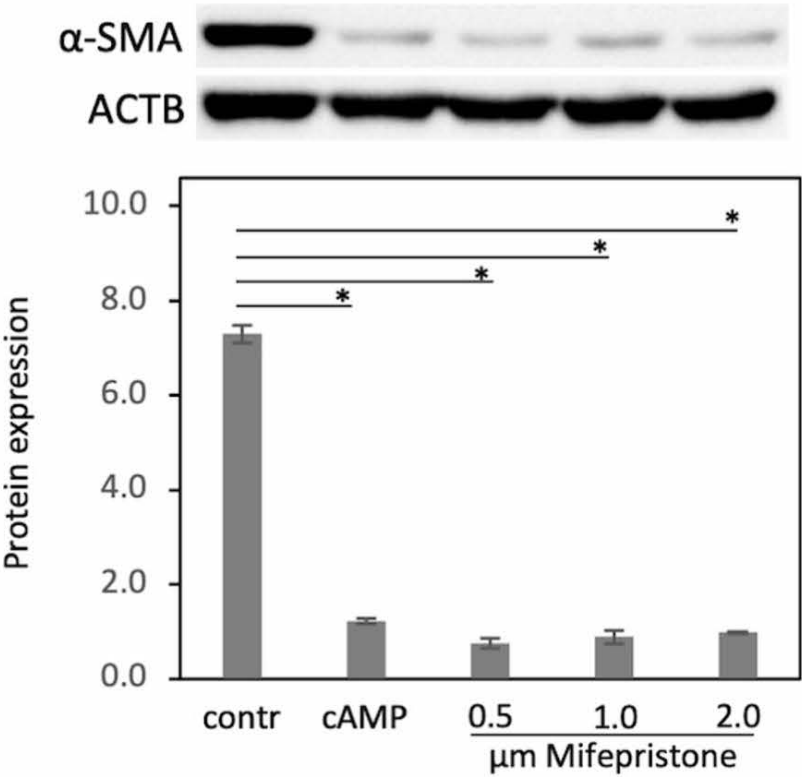

Aglepristone,  $\alpha$ -SMA, 42 kDa  
(Cropped)

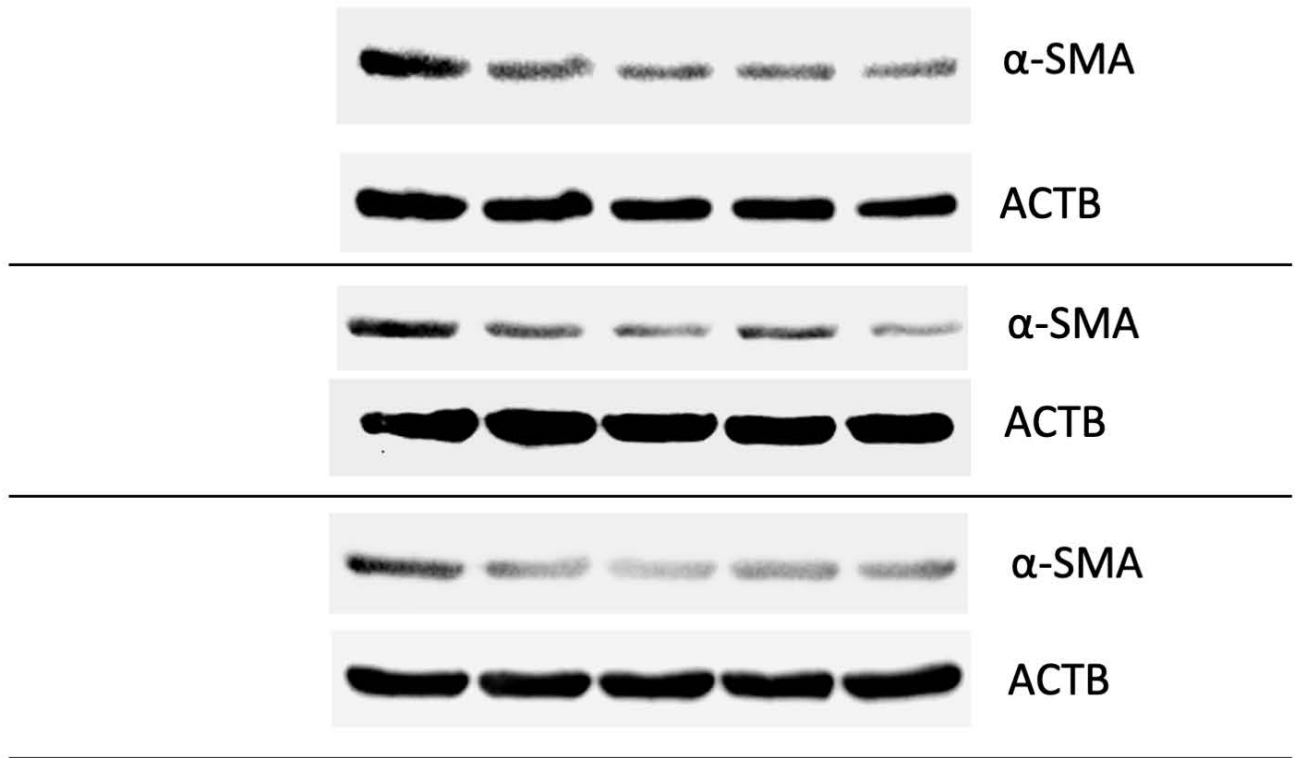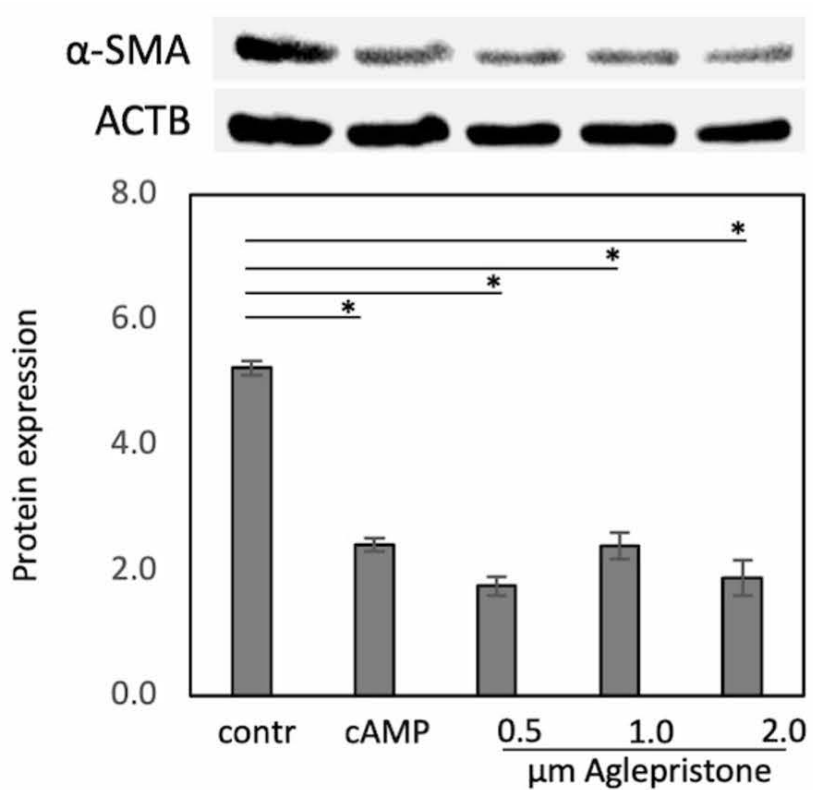

Mifepristone, PCNA, 29 kDa

(Cropped)

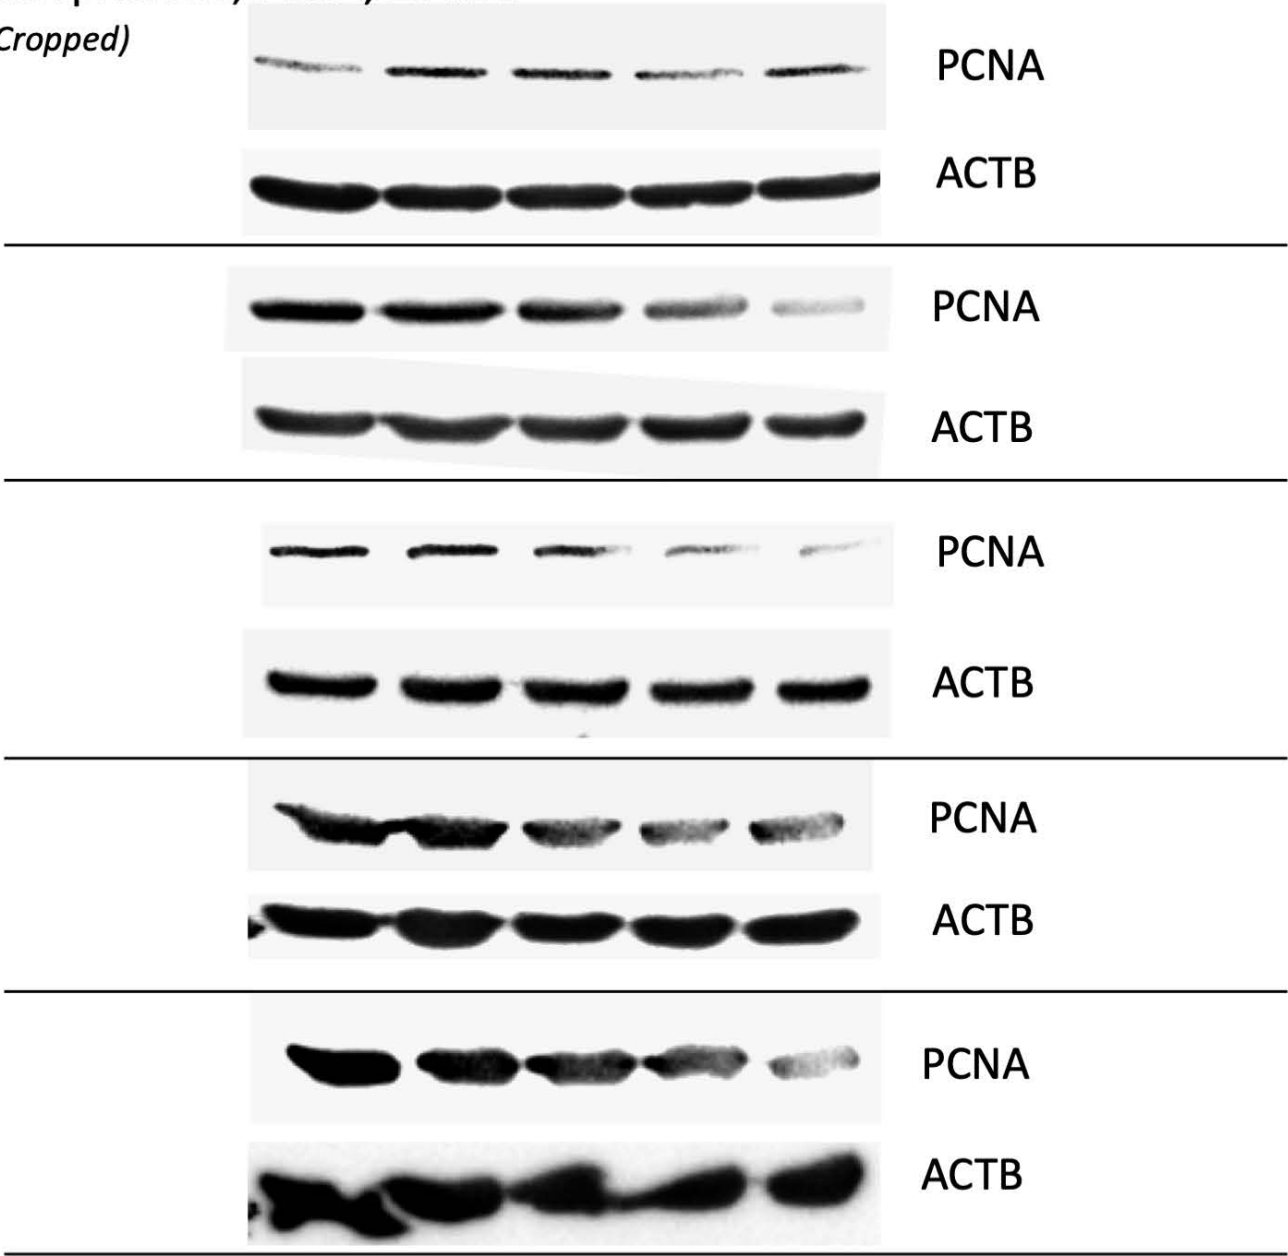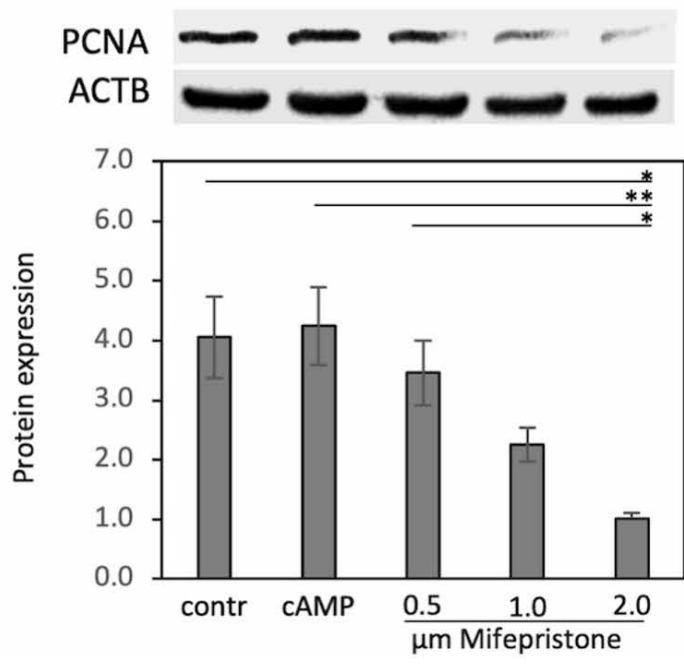

Aglepristone, PCNA, 29 kDa  
(Cropped)

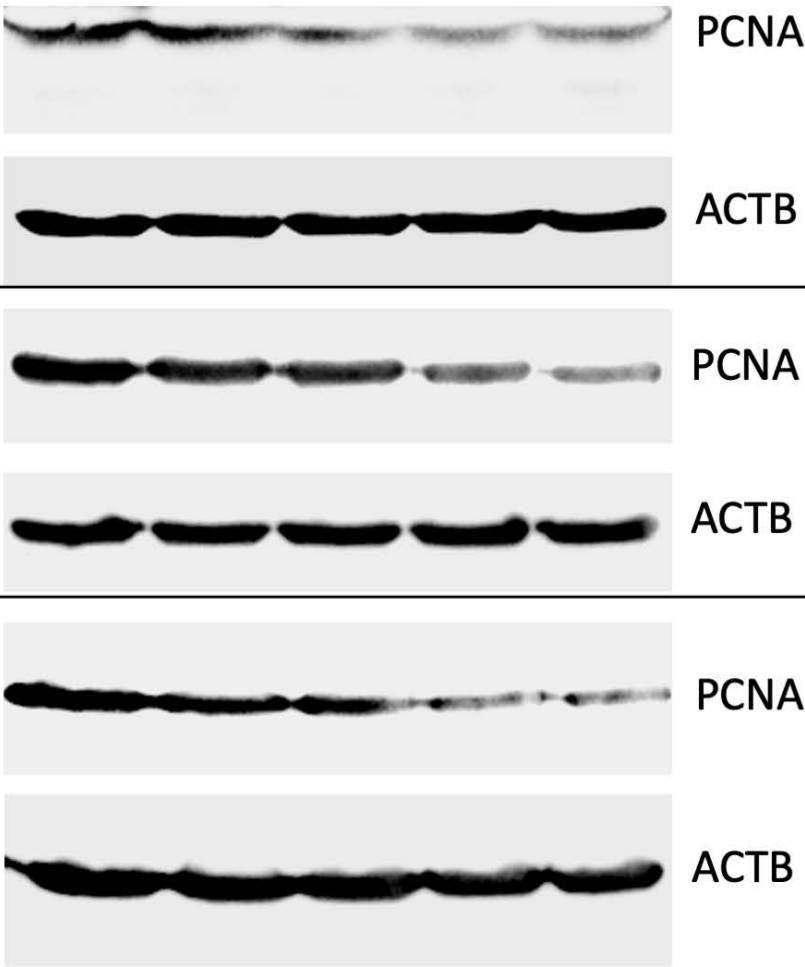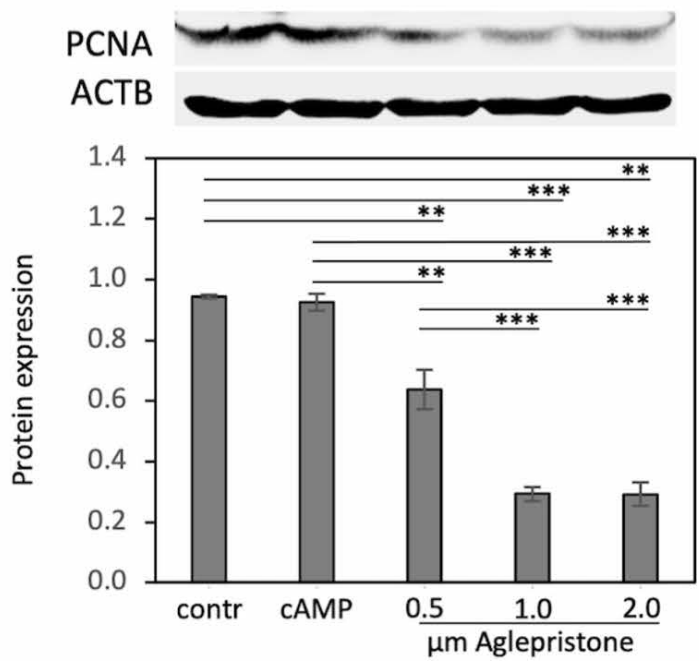

# Mifepristone, a-CASP, 20 kDA

(Cropped)

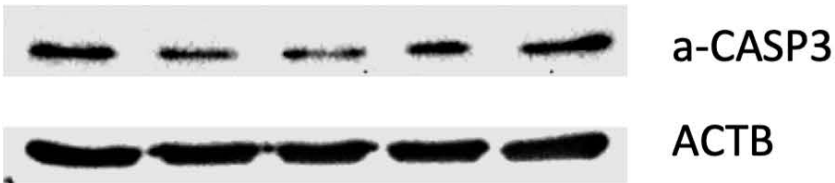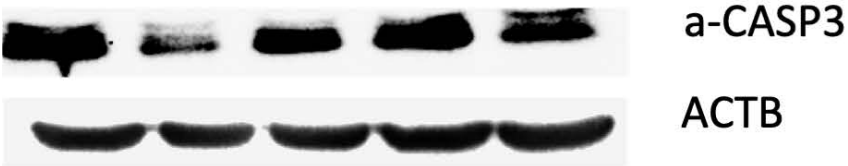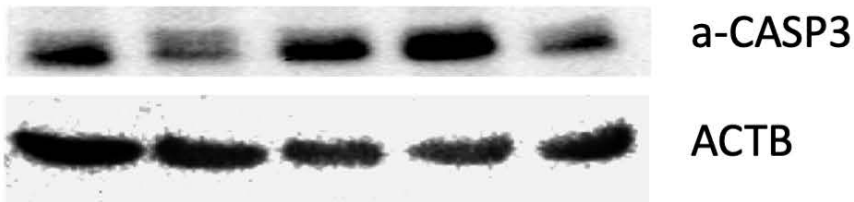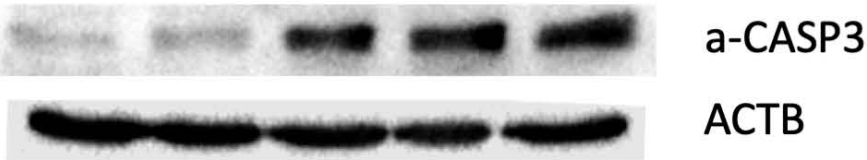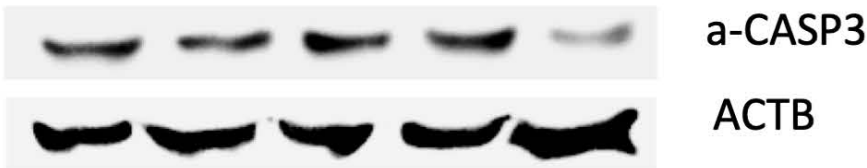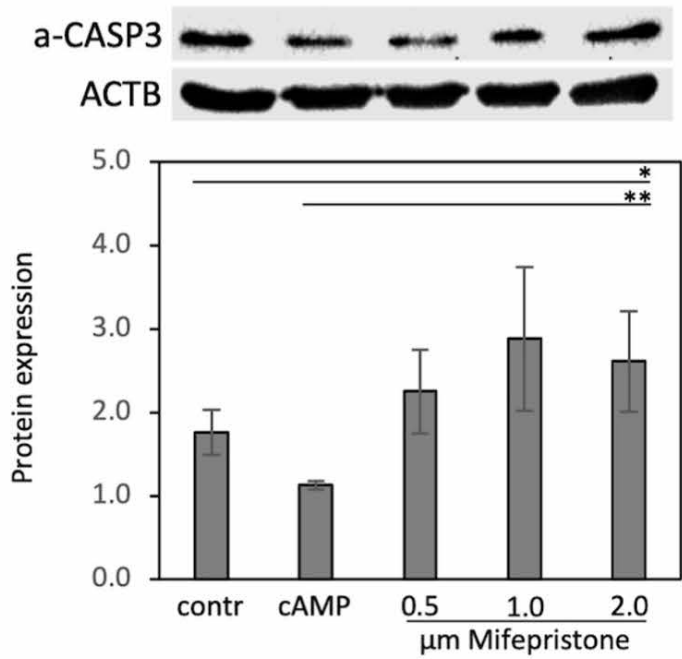

Aglepristone, a-CASP, 20 kDa  
(Cropped)

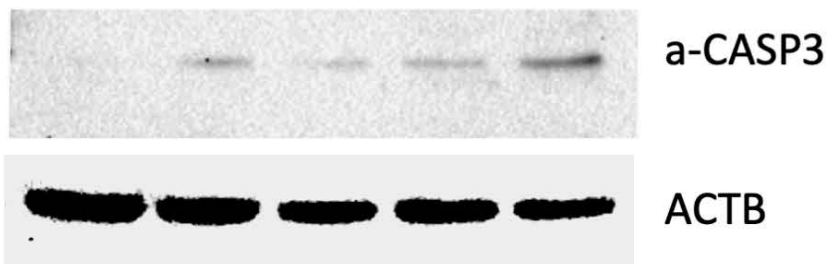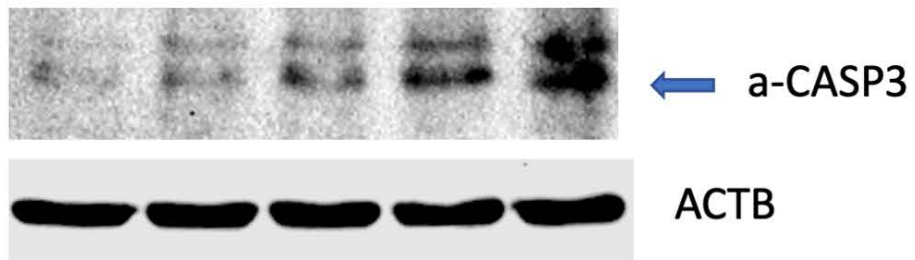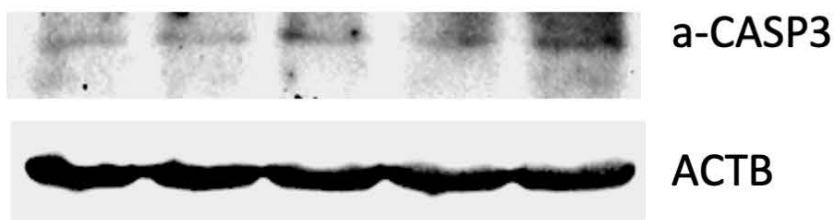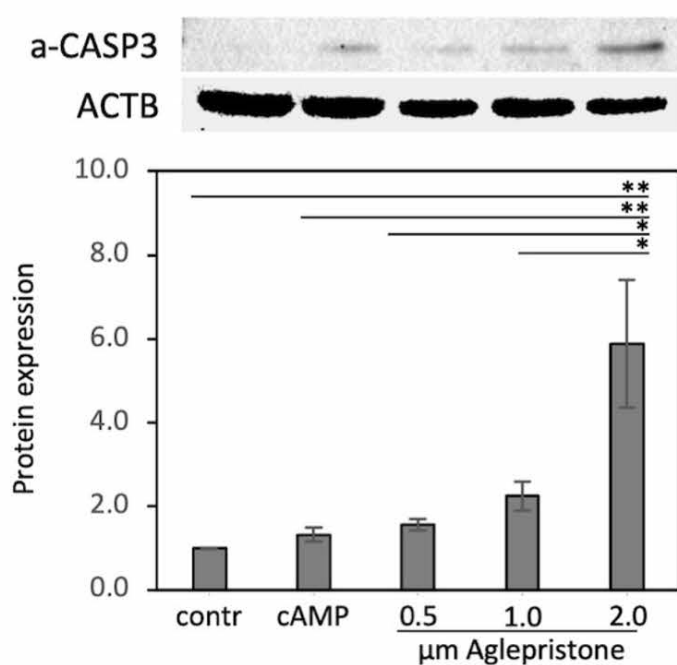

# Mifepristone

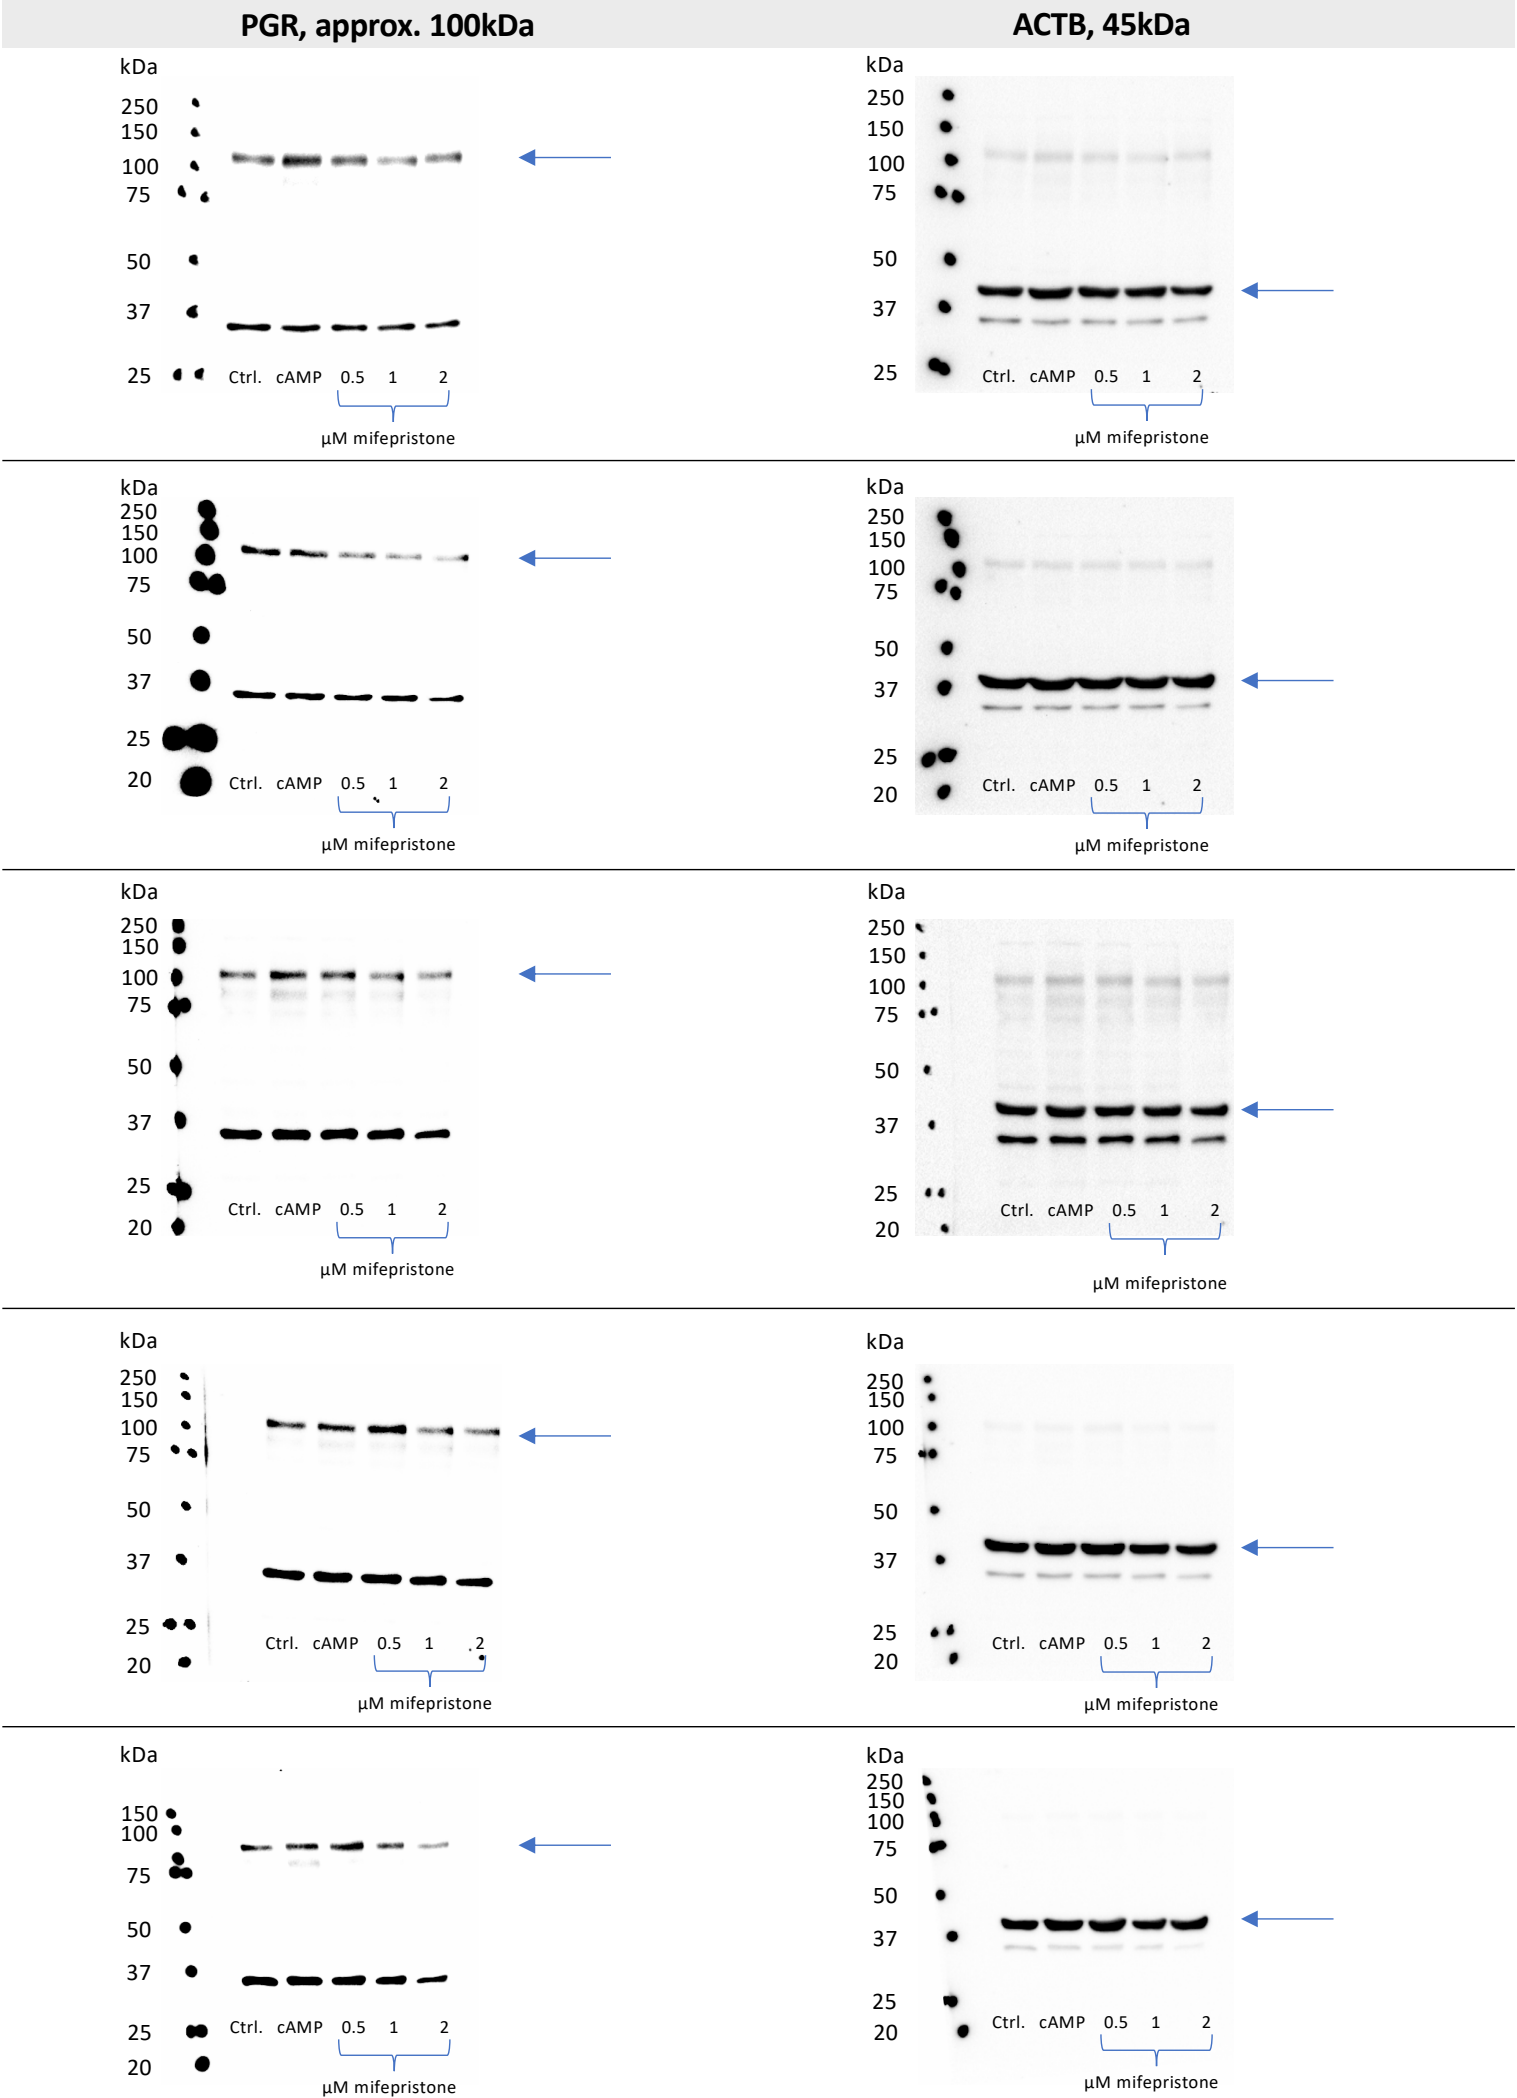

# Aglepristone

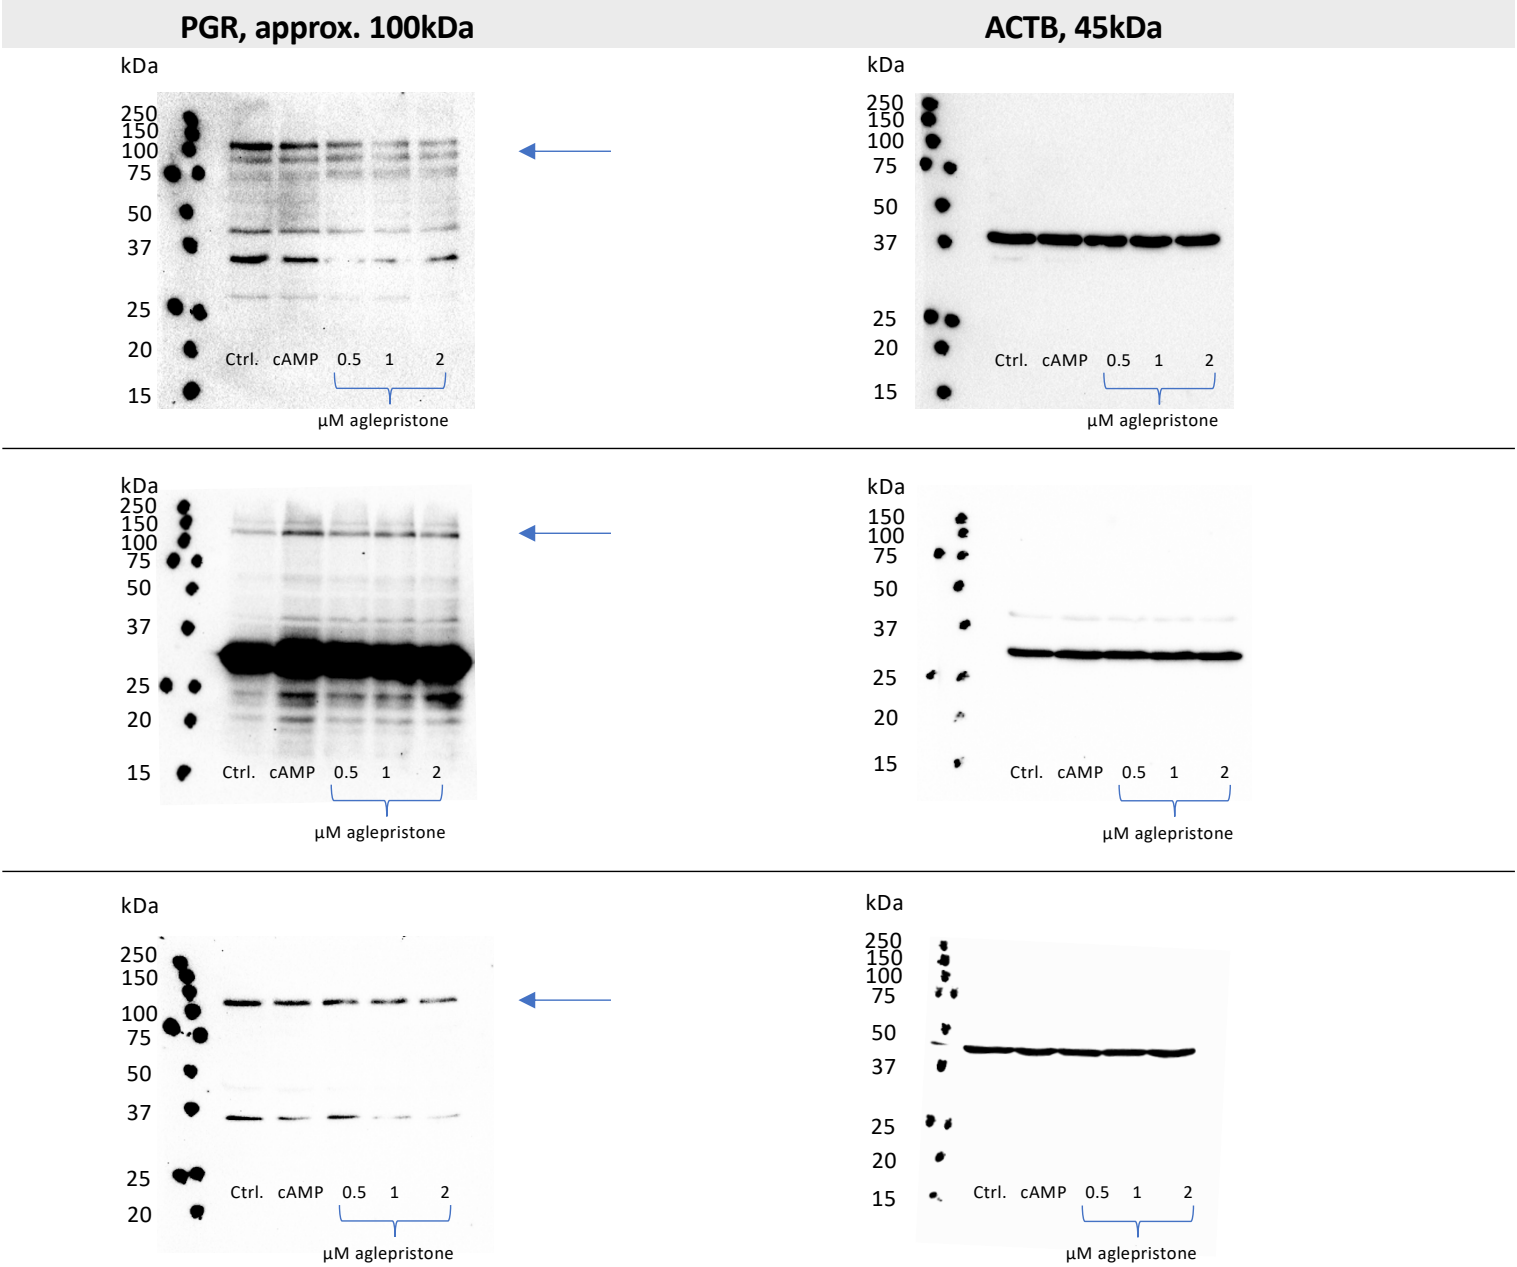



# Mifepristone

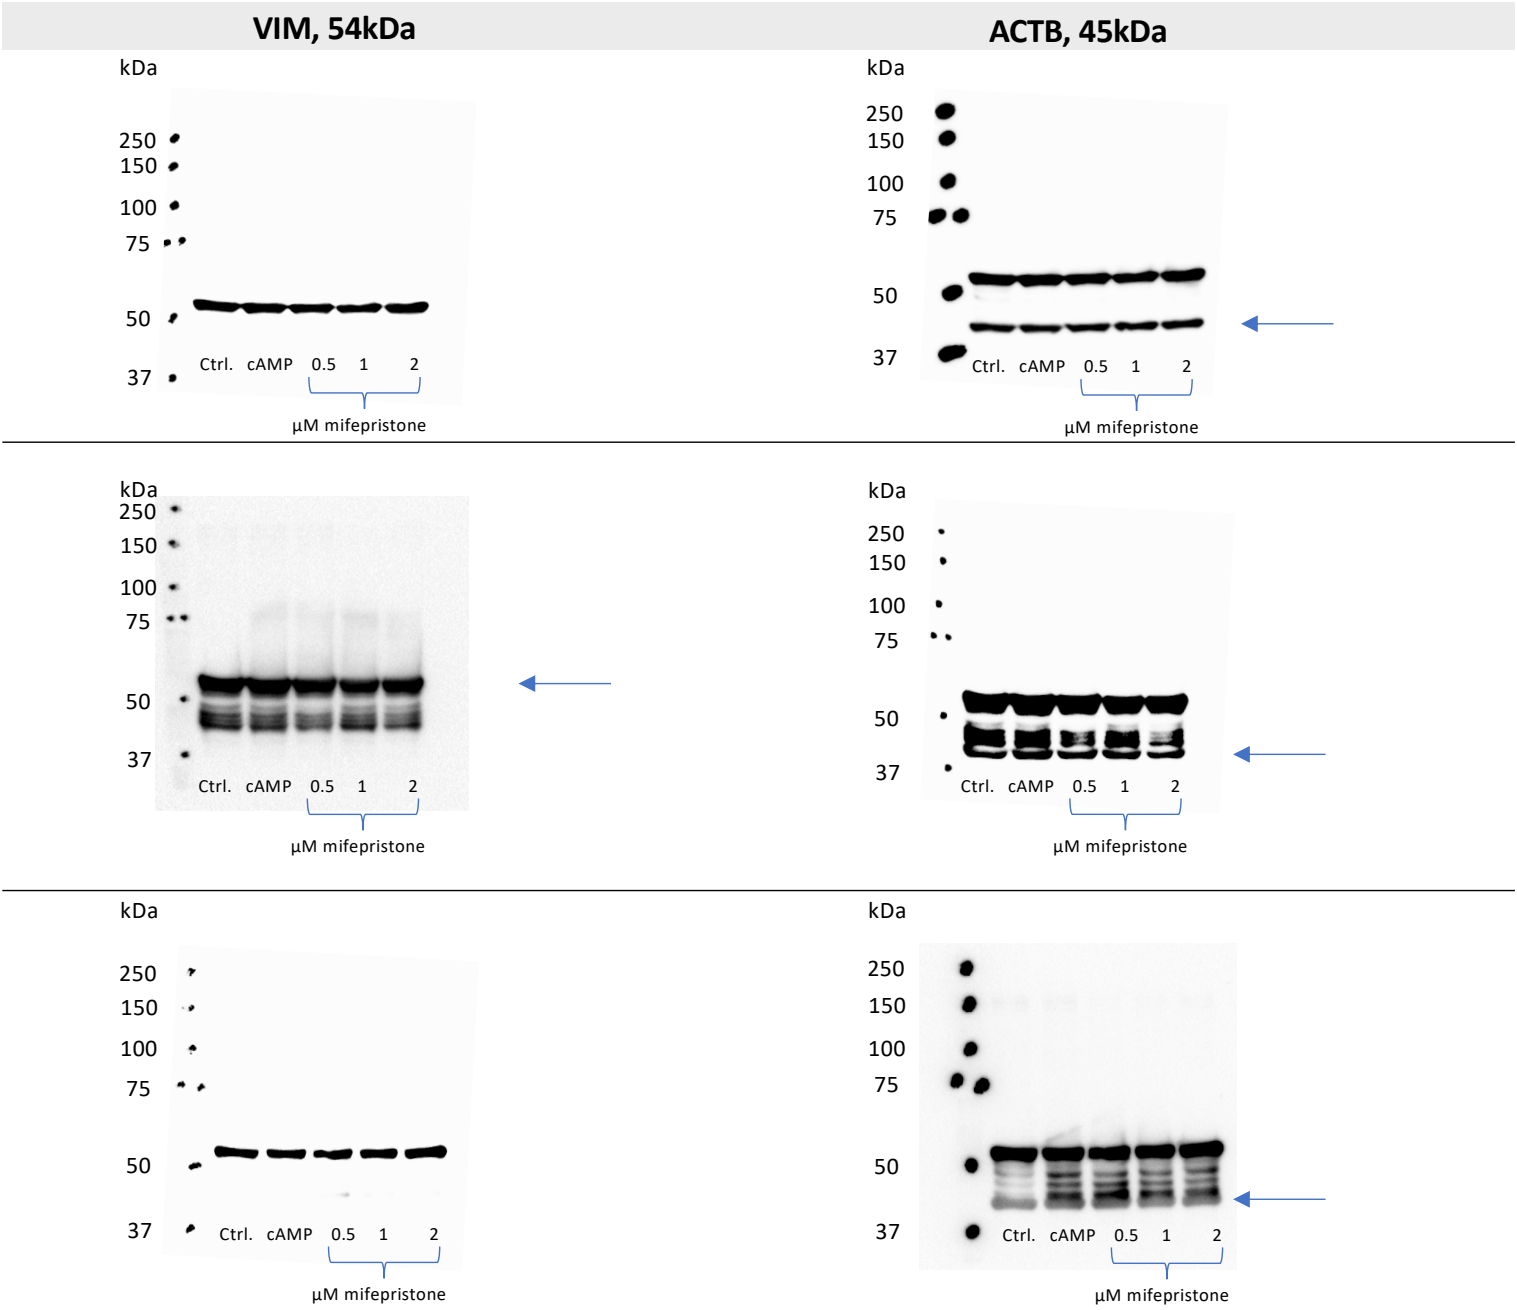

# Aglepristone

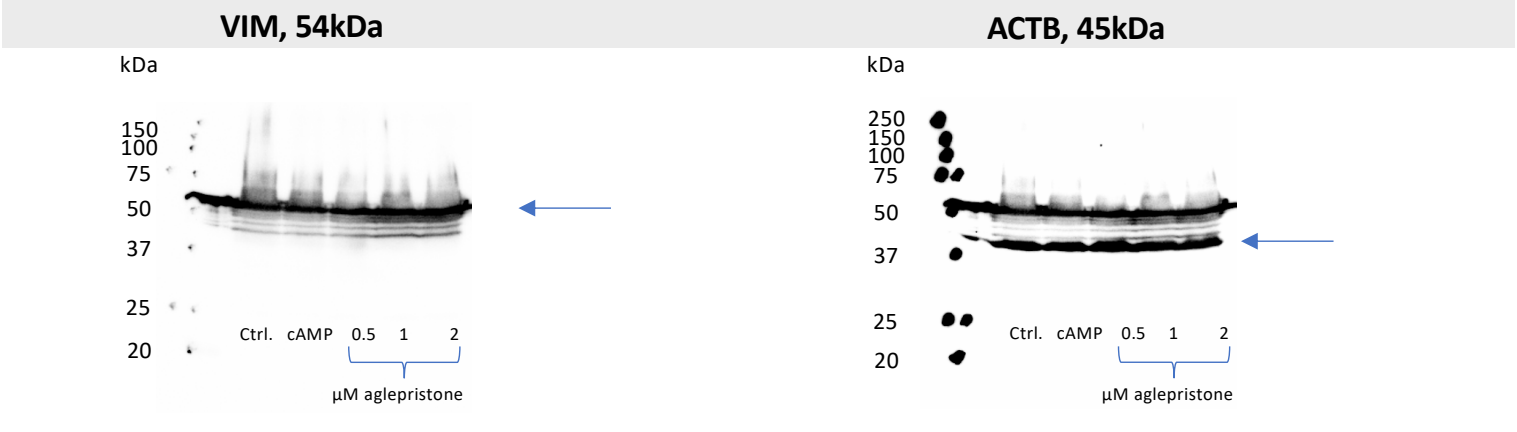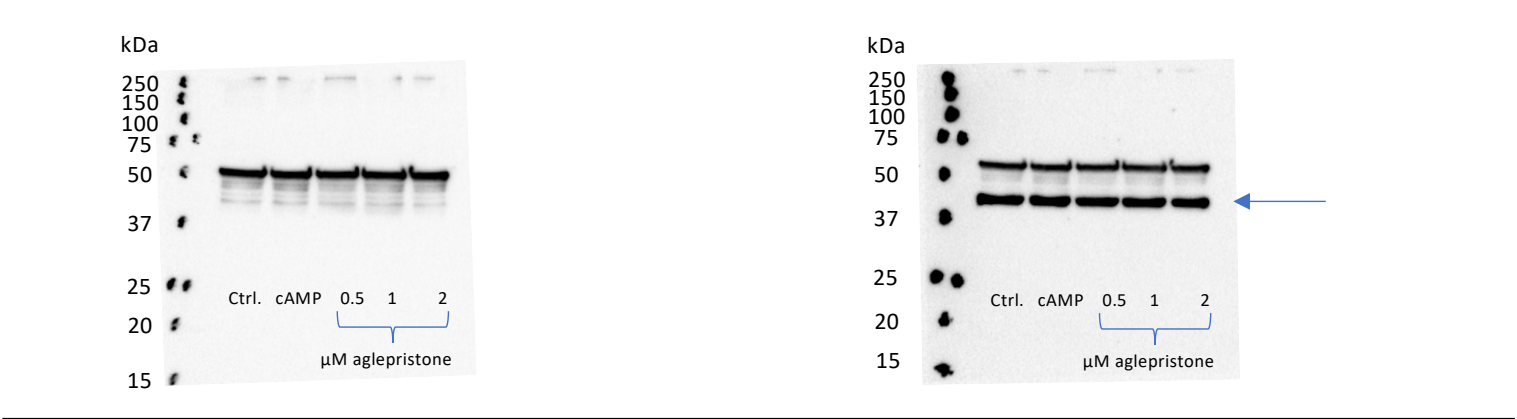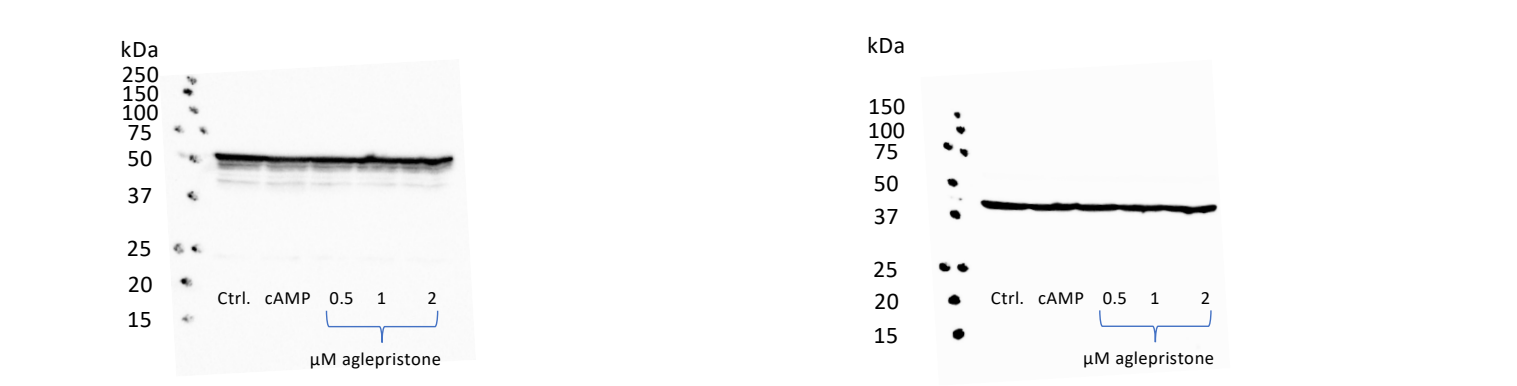

# Mifepristone

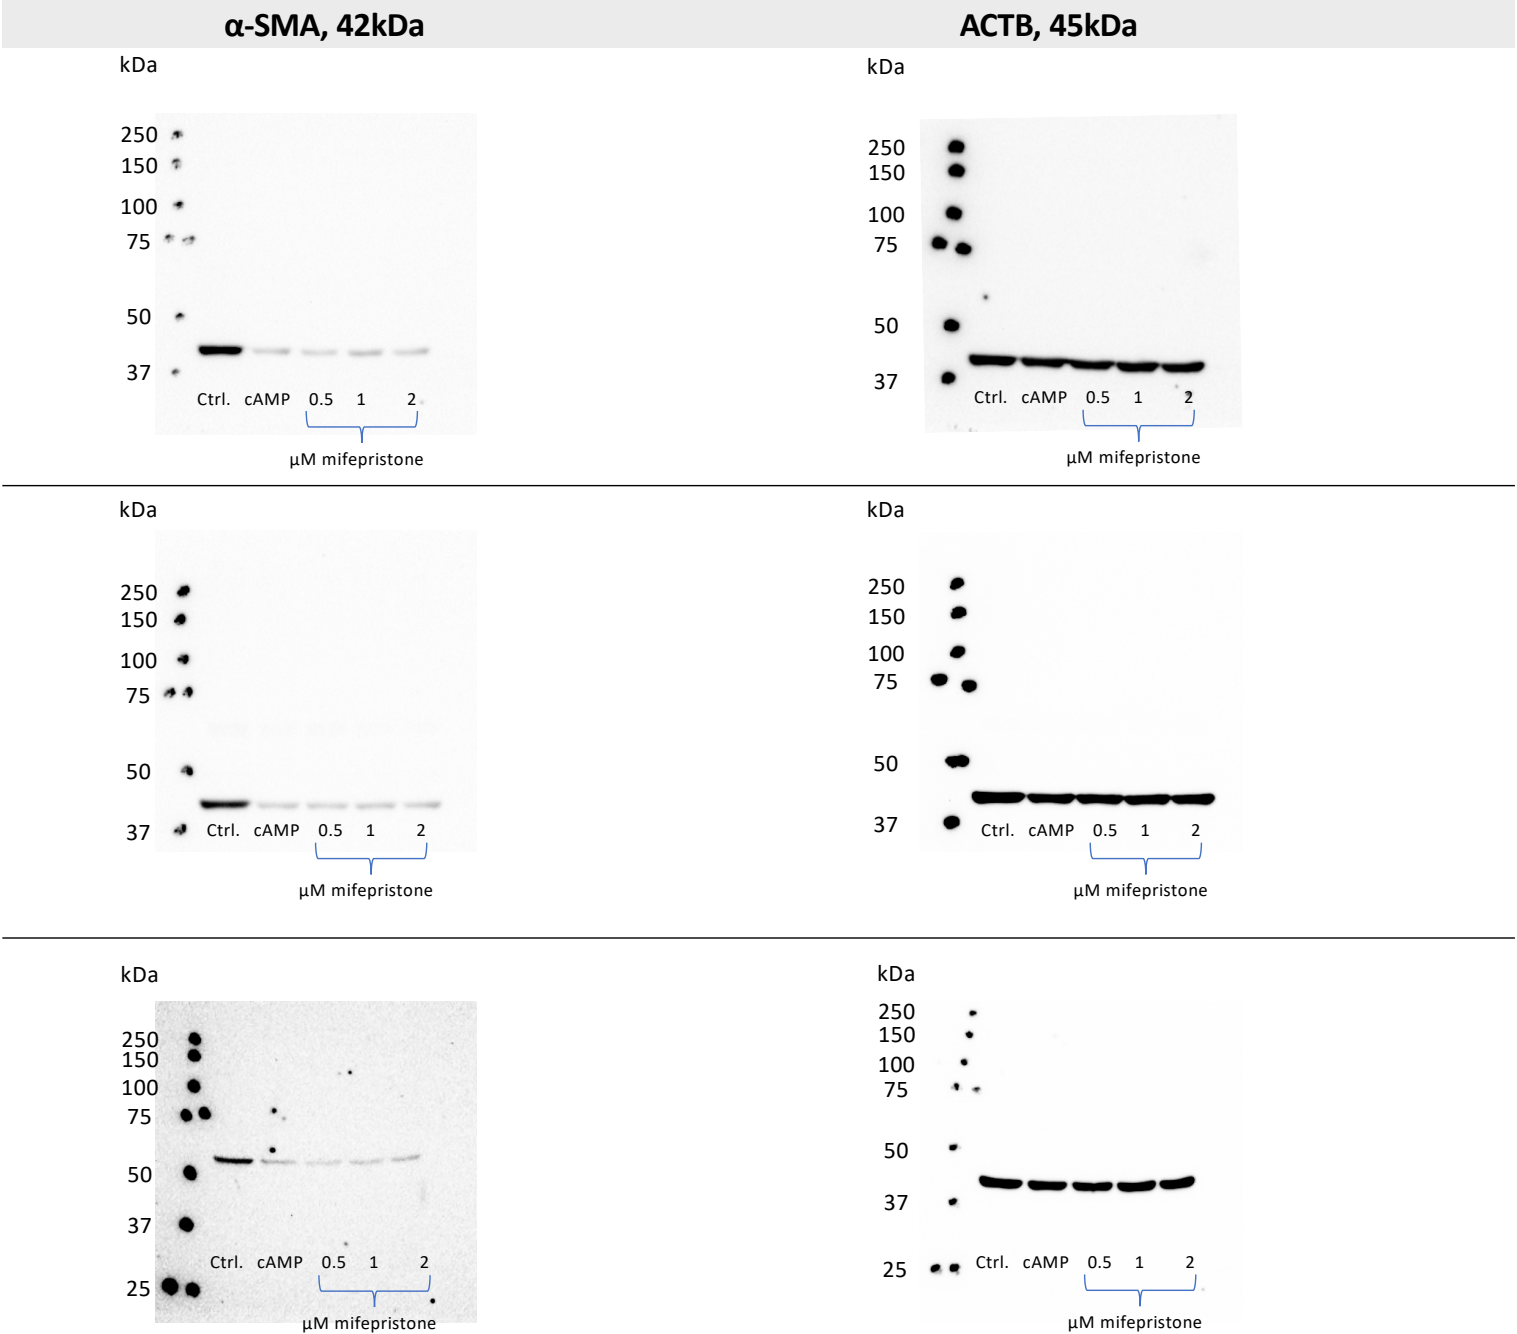

# Aglepristone

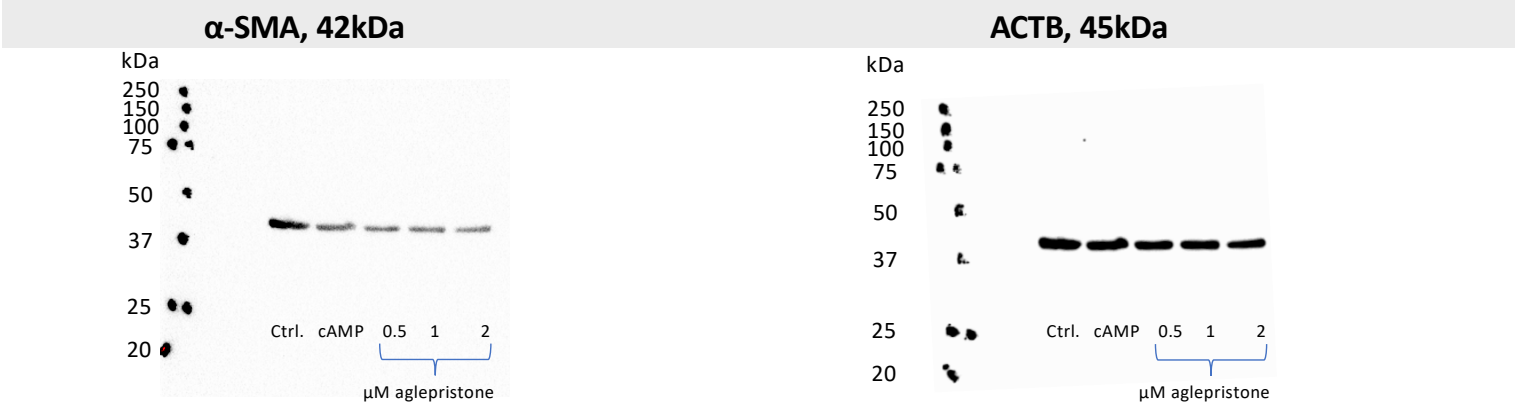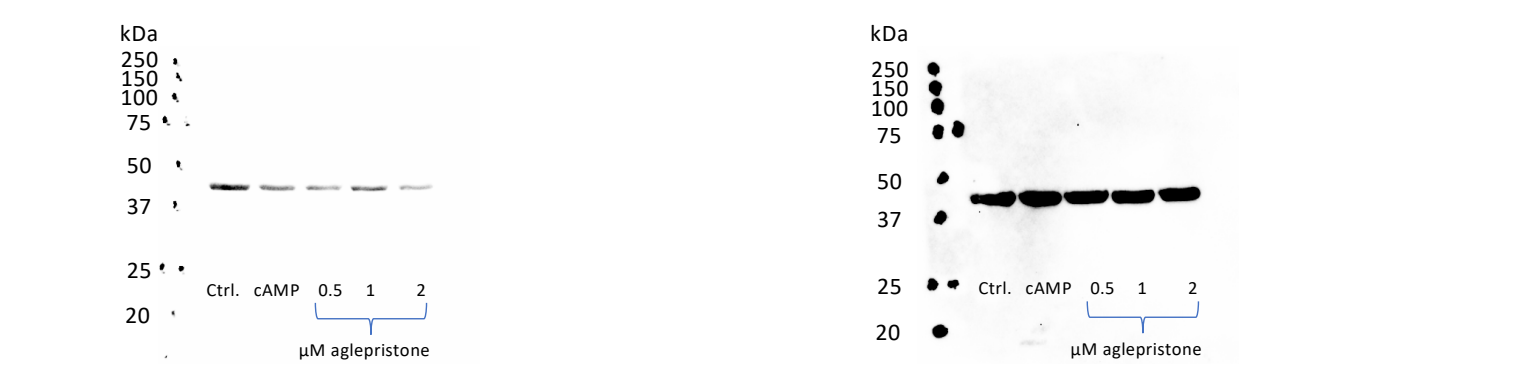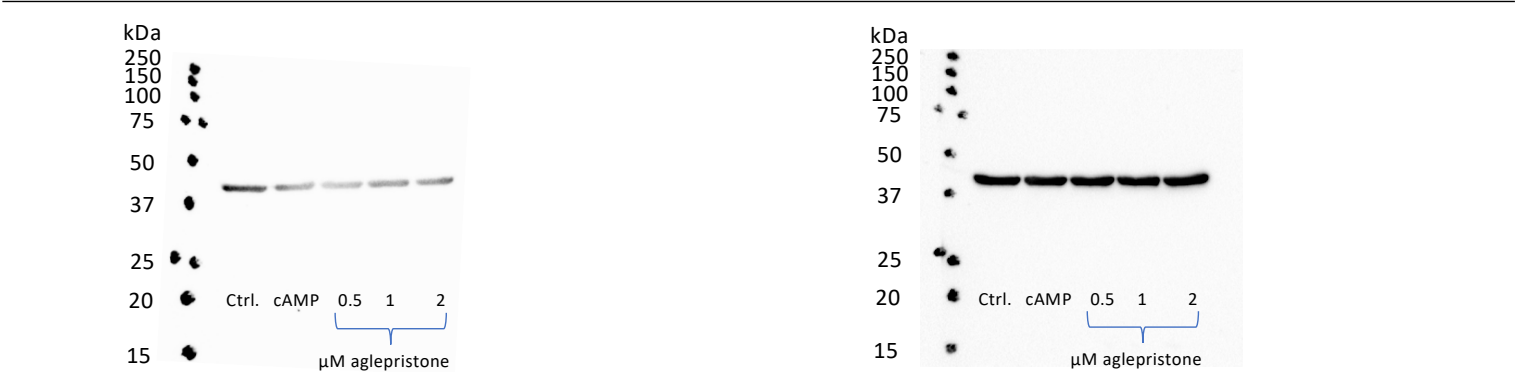

# Mifepristone

PCNA, 29 kDa

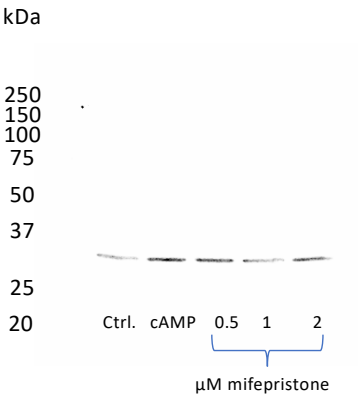

ACTB, 45kDa

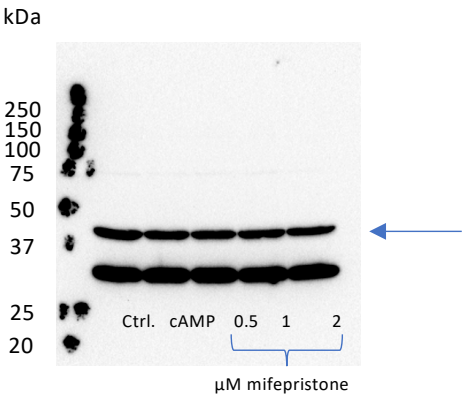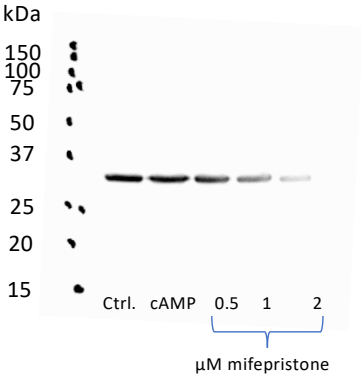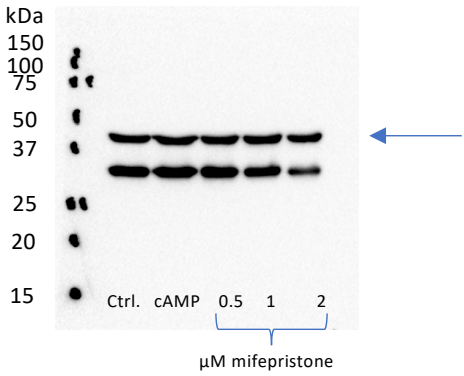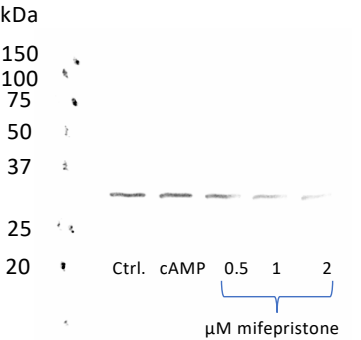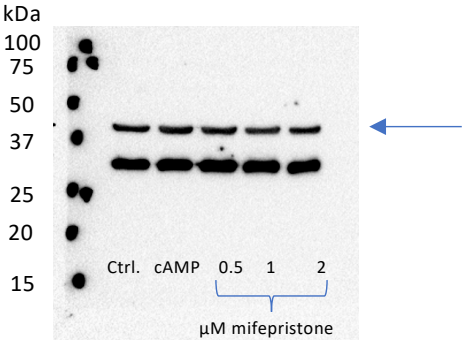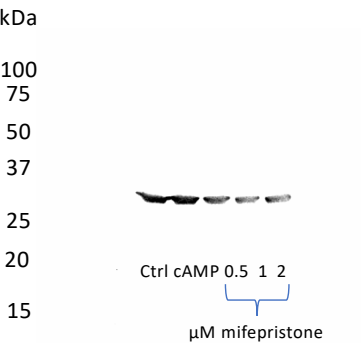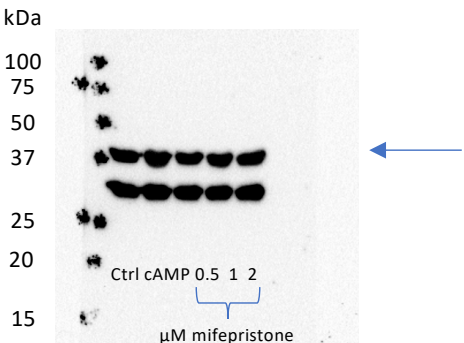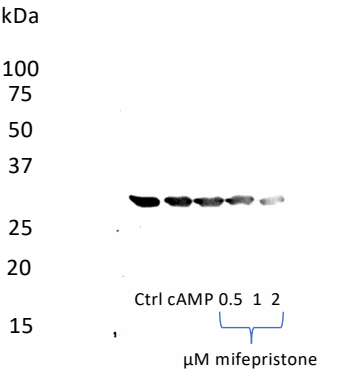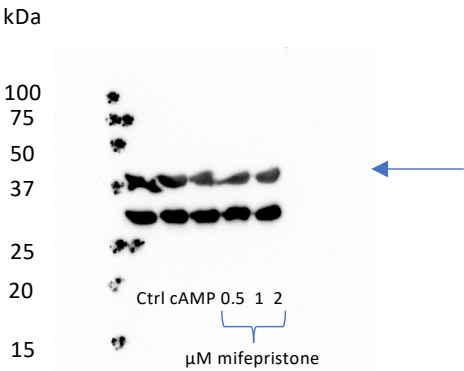

# Aglepristone

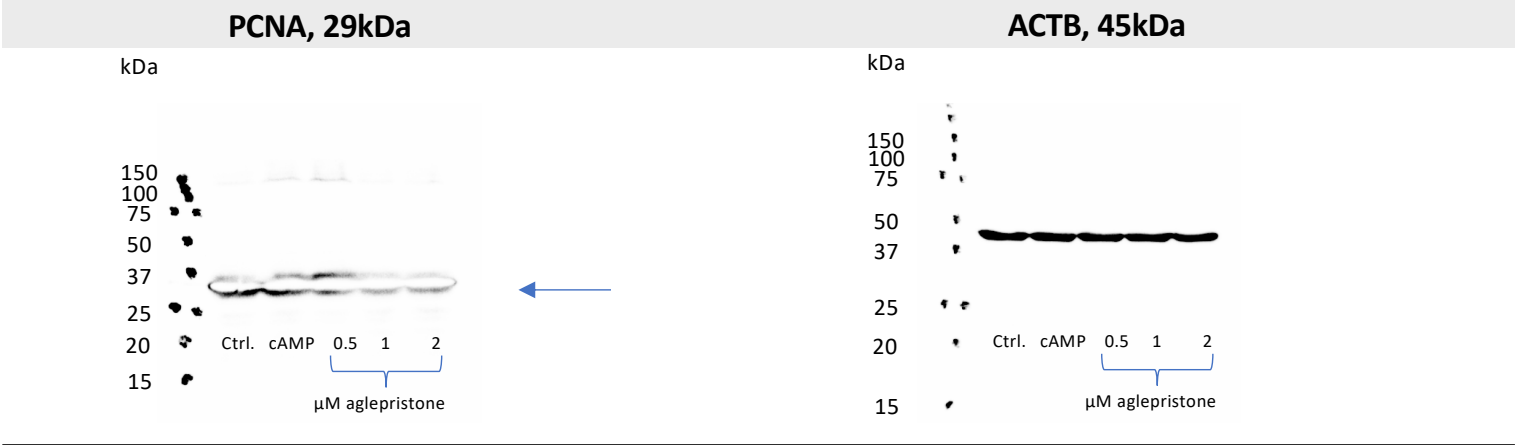

# Mifepristone

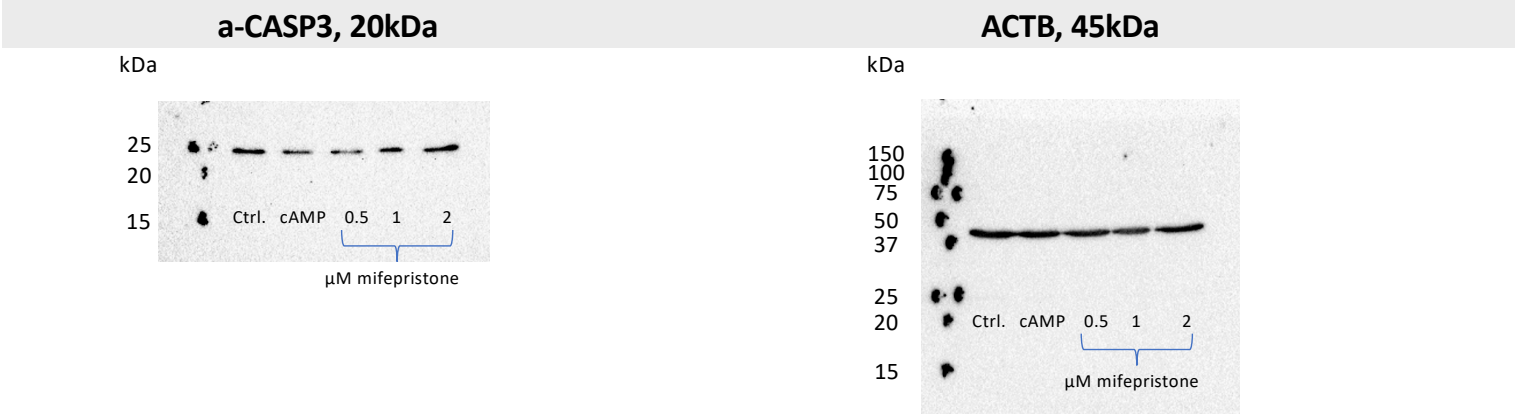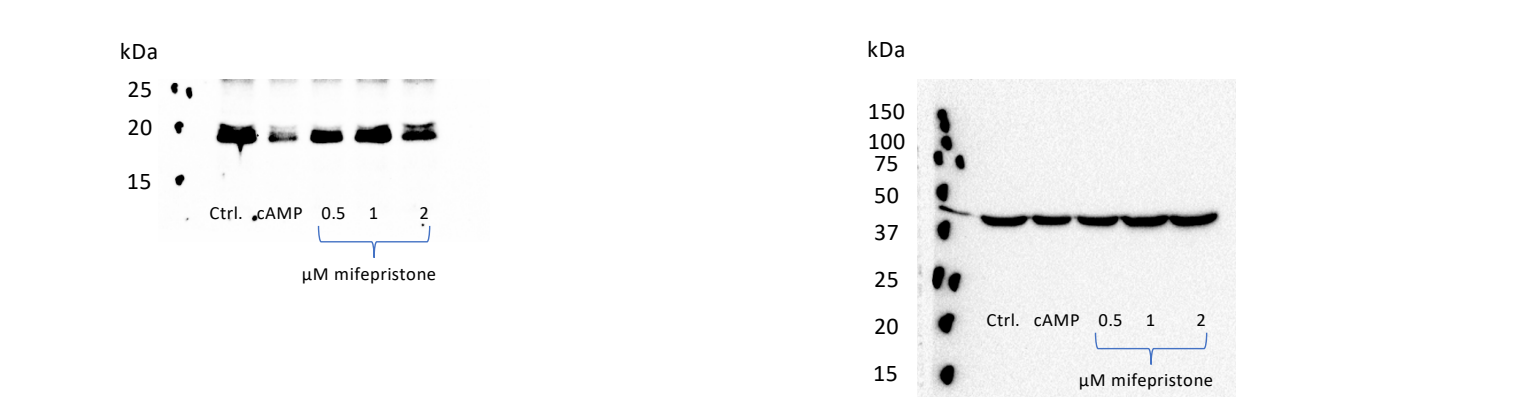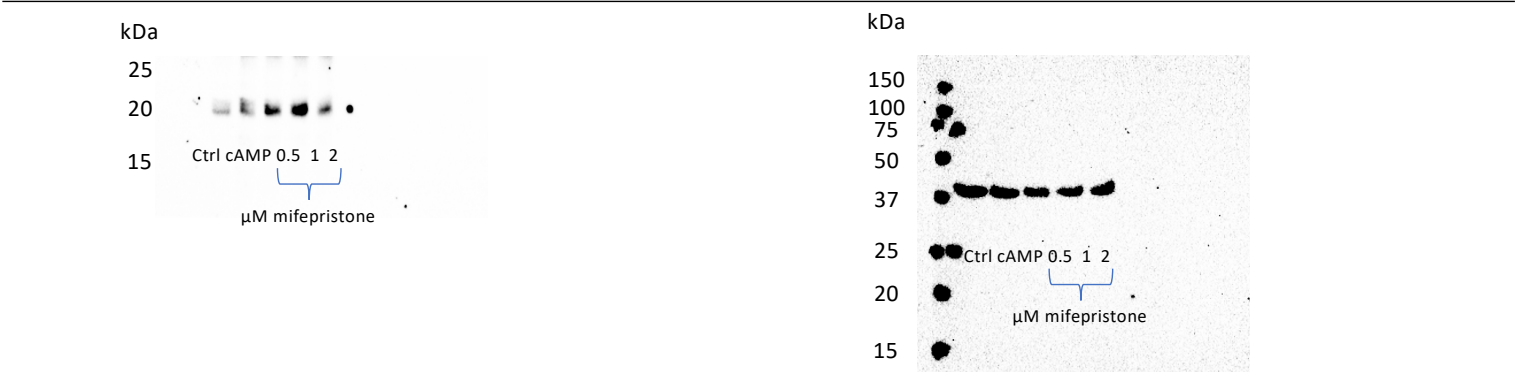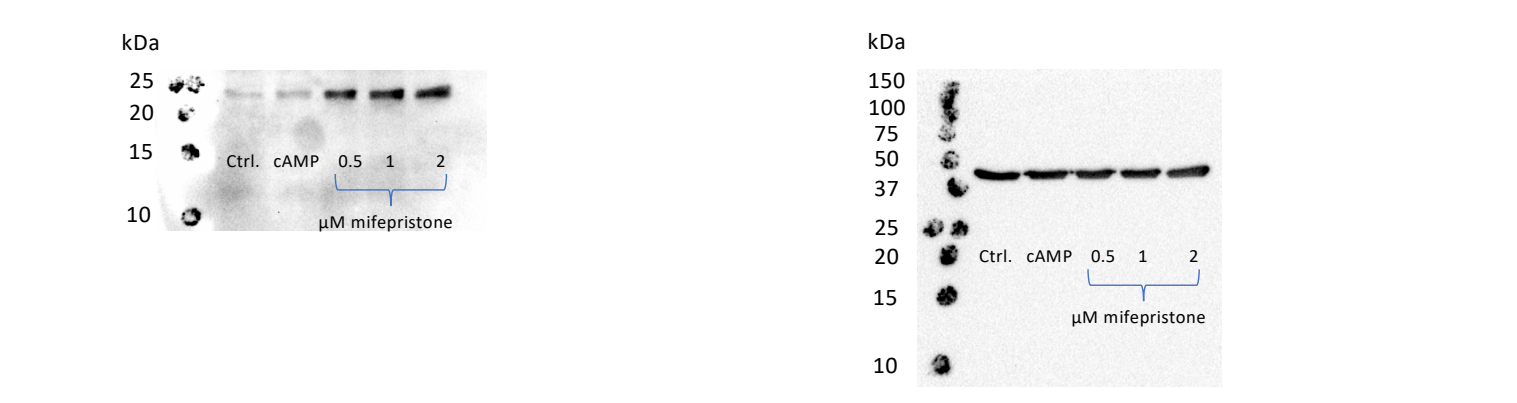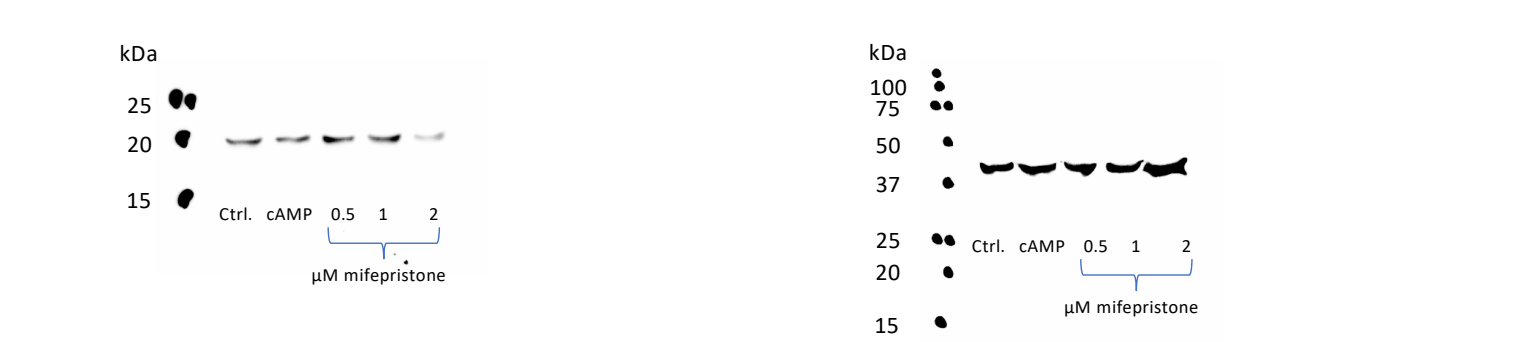

# Aglepristone

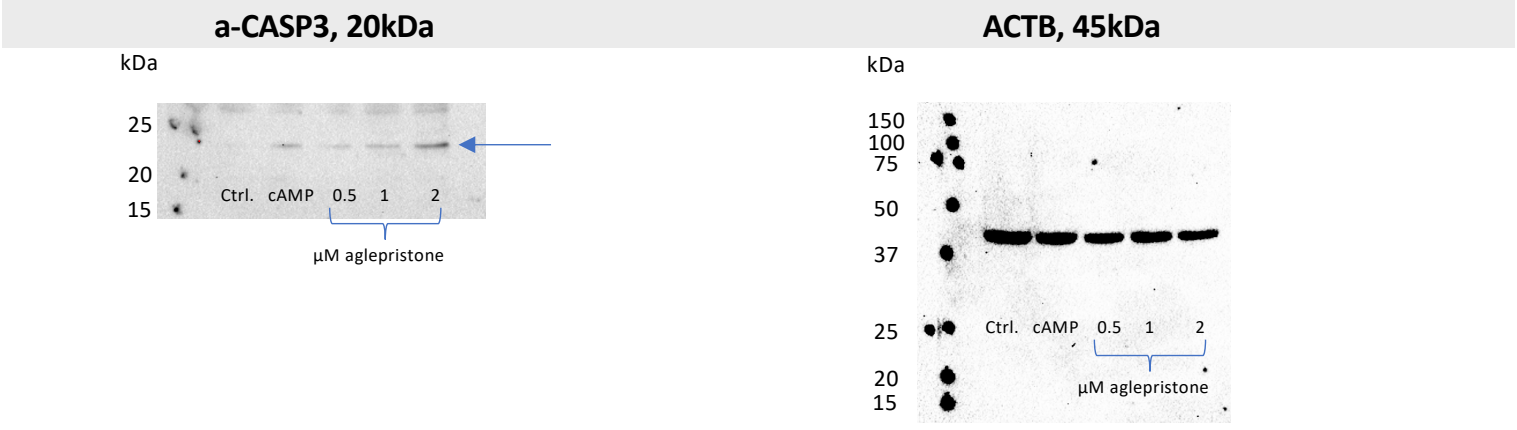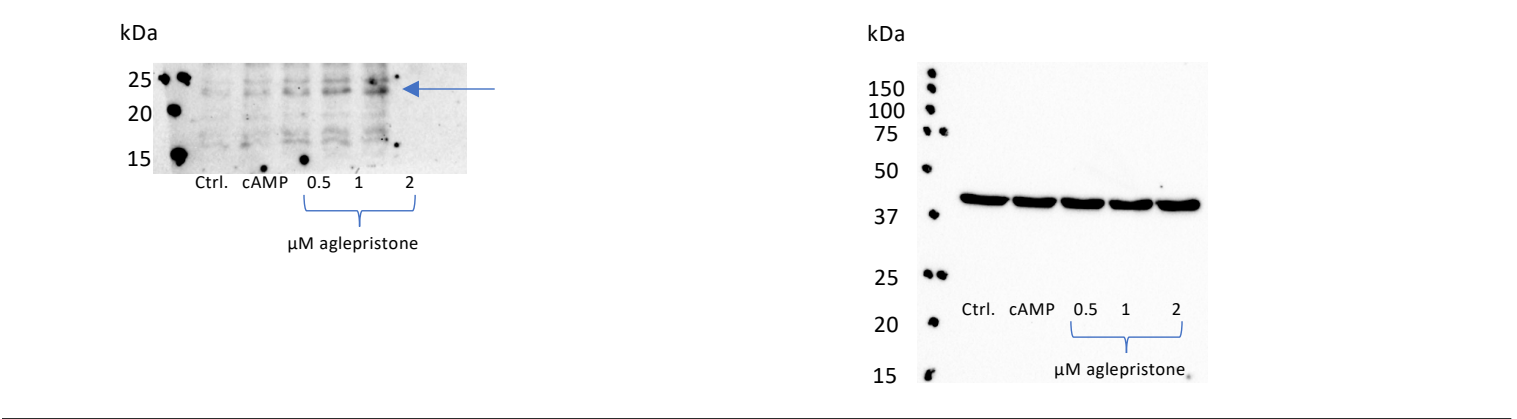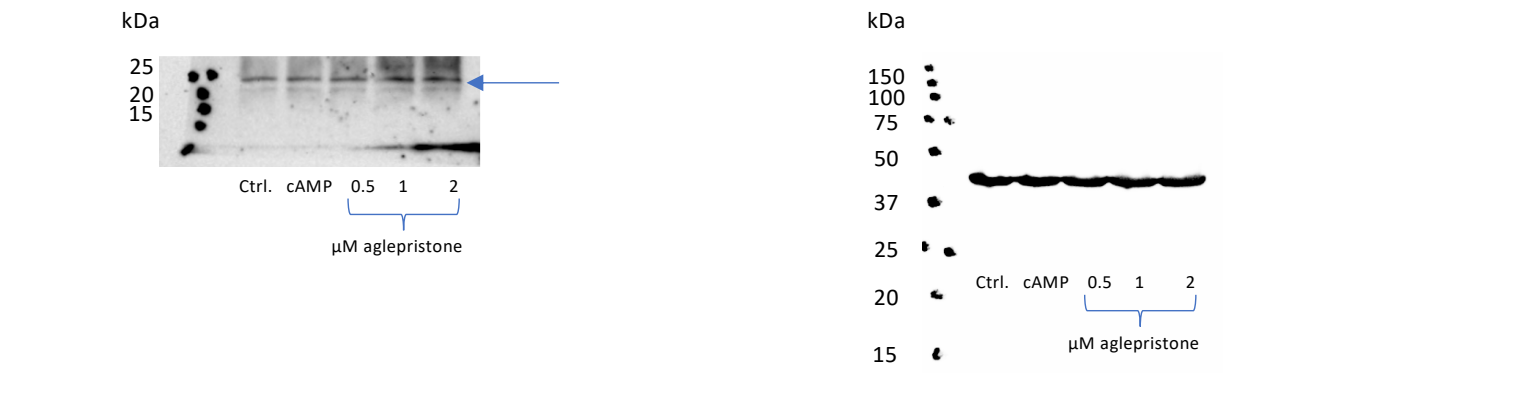

Supplement: s1 [file s1]
